# Supplementary material for: The value of US coral reefs for flood risk reduction
Source: Springer Nature journal article supplement (doi:10.1038/s41893-021-00706-6), 2021-04-15
Supplement: 41893_2021_706_MOESM1_ESM.pdf [file 41893_2021_706_MOESM1_ESM.pdf]

**Supplementary information**

---

**The value of US coral reefs for flood risk reduction**

---

In the format provided by the authors and unedited

## Supplementary Information

### Coral reefs reduce flood damage in the U.S.

Borja G. Reguero<sup>1\*</sup>, Curt D. Storlazzi<sup>2</sup>, Ann E. Gibbs<sup>2</sup>, James B. Shope<sup>1</sup>, Aaron D. Cole<sup>3</sup>,  
Kristen A. Cumming<sup>2</sup>, Michael W. Beck<sup>1</sup>

#### Affiliations:

<sup>1</sup> University of California, Institute of Marine Sciences, Santa Cruz, CA, 95060, USA

<sup>2</sup> United States Geological Survey, Pacific Coastal and Marine Science Center, Santa Cruz, CA 95060, USA

<sup>3</sup> University of California, Center for Integrated Spatial Research, Santa Cruz, CA, 95060, USA

\*Correspondence to: [breguero@ucsc.edu](mailto:breguero@ucsc.edu)

## Supplementary Figures

Fig. S1.

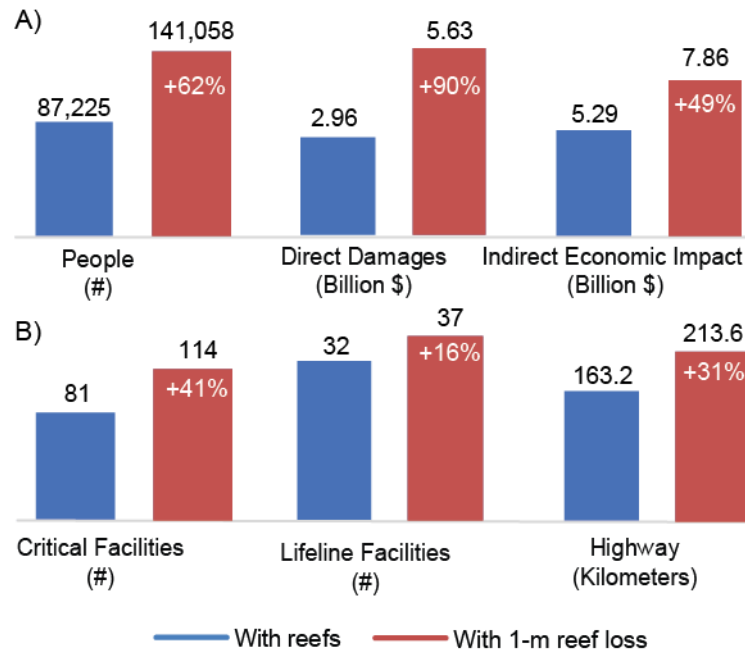

Nation-wide estimates of the 100-yr flood risk in reef-lined coasts. The blue bars and lines represent the damage in the 100-yr flood zone with reefs and the red bars with 1-m reef loss. (A) Risk and benefits for people, direct damages to buildings, and indirect economic impact. (B) Breakdown of Expected Annual Damages by type of critical infrastructure.

**Fig. S2.**

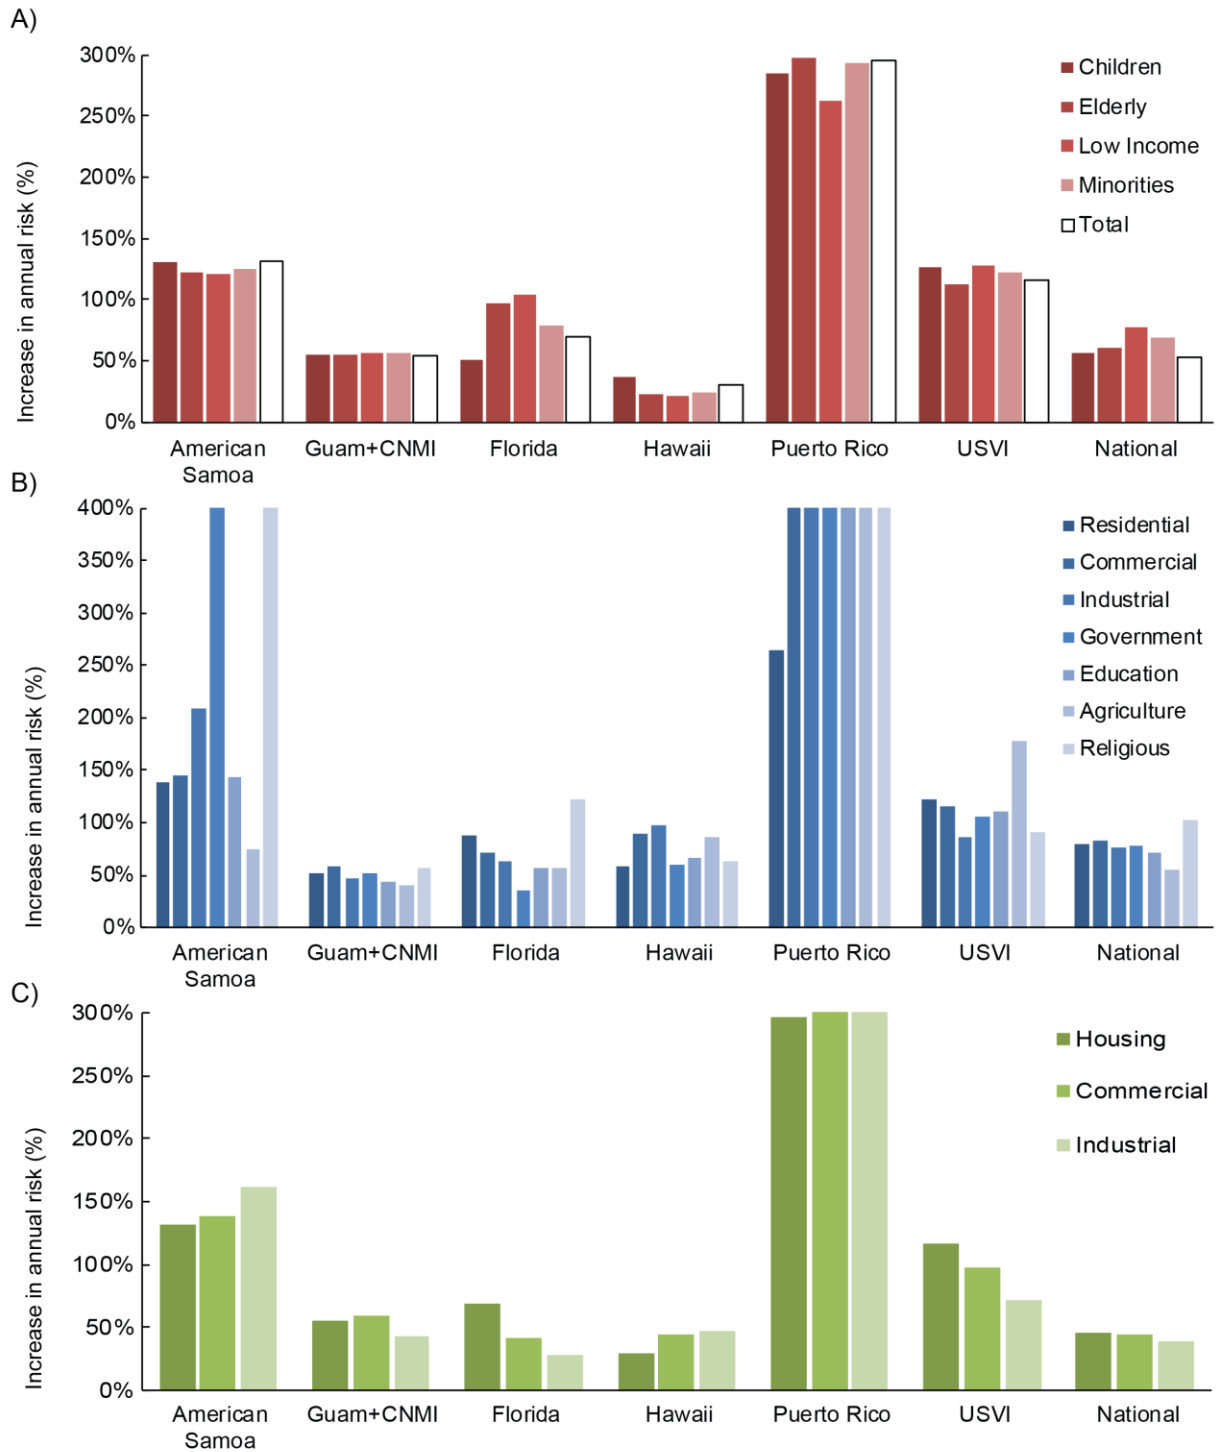

**Regional breakdown of the risk reduction provided by coral reefs.** The bar represents percent increases in Annual Expected Damages with 1-m reef loss. (A) Demographic breakdown. (B) Breakdown by building types. (C) Breakdown of economic disruption by type of sector.

Fig. S3

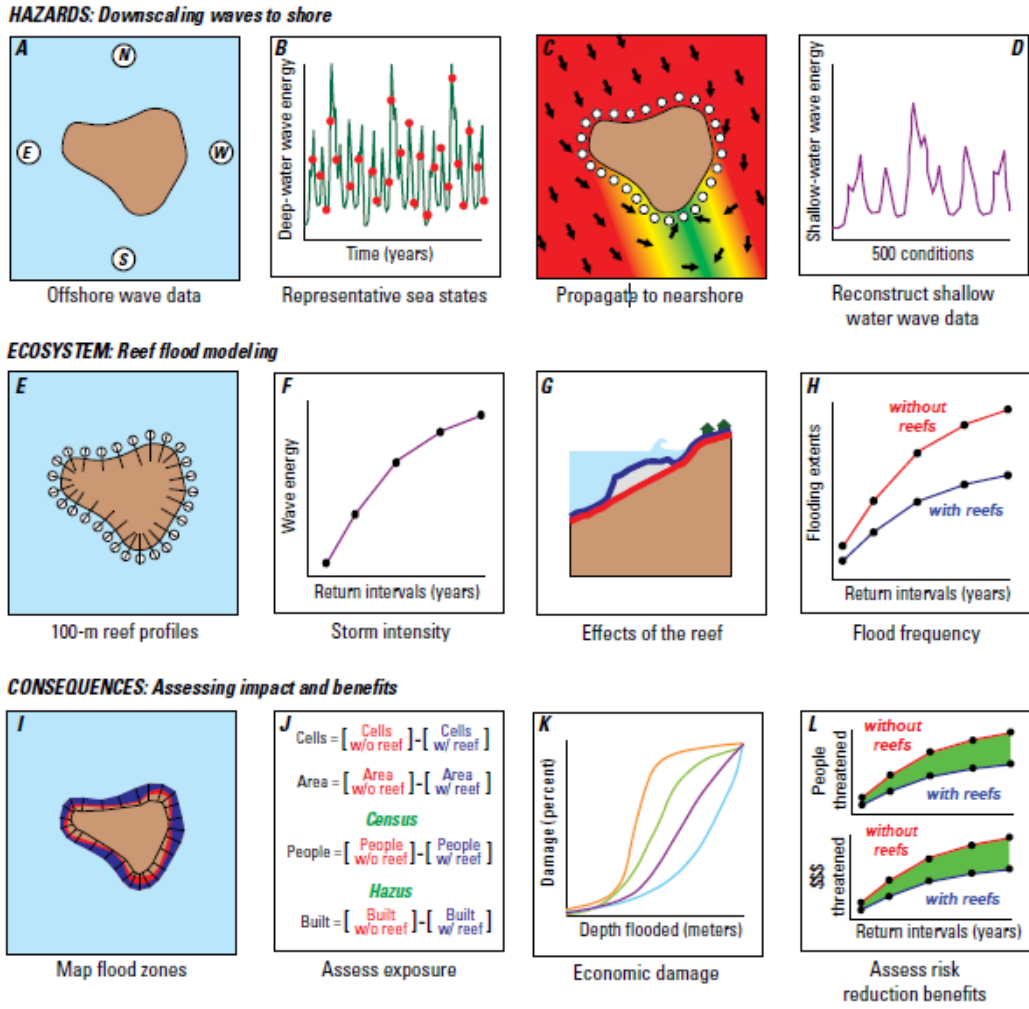

**Modeling approach.** Sequential steps to evaluate the role of coral reefs in hazard risk reduction.

## Supplementary Tables

**Table S1.**

| People           |         |               |               |
|------------------|---------|---------------|---------------|
| City             | State   | County        | Population    |
| Hallandale Beach | Florida | Miami/Broward | 1,169         |
| Lahaina          | Hawaii  | Maui          | 786           |
| Kihei            | Hawaii  | Maui          | 724           |
| Maunalua Bay     | Hawaii  | Oahu          | 722           |
| Hollywood        | Florida | Broward       | 647           |
| Economic Value   |         |               |               |
| City             | State   | County        | Total Dollars |
| Lahaina          | Hawaii  | Maui          | \$ 85,359,099 |
| Kihei            | Hawaii  | Maui          | \$ 66,614,447 |
| Hallandale Beach | Florida | Miami/Broward | \$ 65,778,240 |
| Hollywood        | Florida | Broward       | \$ 62,081,371 |
| Maunala Bay      | Hawaii  | Oahu          | \$ 55,655,957 |

Top five communities receiving the highest annual risk reduction benefits from coral reefs in terms of people and economic value (direct and indirect), per kilometer of coastline.

**Table S2.**

| Region         | Sublocation  | Population | Adverted direct damages to buildings | Averted economic disruption |
|----------------|--------------|------------|--------------------------------------|-----------------------------|
| American Samoa | Tutuila      | 570        | \$25,019,327                         | \$7,010,804                 |
|                | Ofu-Olosega  | 3          | \$77,852                             | \$40,707                    |
|                | Tau          | 8          | \$753,845                            | \$146,998                   |
| CNMI           | Saipan       | 396        | \$5,003,426                          | \$7,970,049                 |
|                | Tinian       | 7          | \$672,257                            | \$140,812                   |
| Guam           | Guam         | 107        | \$6,839,500                          | \$10,078,571                |
| Florida        | Mainland     | 4,947      | \$323,835,761                        | \$276,082,074               |
|                | Keys         | 716        | \$32,125,237                         | \$41,870,102                |
| Hawaii         | Hawaii       | 336        | \$23,997,824                         | \$26,407,938                |
|                | Maui         | 3,381      | \$112,716,317                        | \$262,533,841               |
|                | Lanai        | 0          | \$53,732                             | \$1,343                     |
|                | Molokai      | 1          | \$42,071                             | \$72,109                    |
|                | Kahoolawe    | -          | -                                    | -                           |
|                | Oahu         | 3,040      | \$200,942,259                        | \$192,907,591               |
|                | Kauai        | 107        | \$5,854,742                          | \$6,397,147                 |
| Niihau         | 0            | -          | \$1,045                              |                             |
| Puerto Rico    | Puerto Rico  | 4,210      | \$65,880,224                         | \$115,224,881               |
|                | Culebra      | 11         | \$148,502                            | \$281,559                   |
|                | Vieques      | 0          | \$94,075                             | \$9,591                     |
| USVI           | Saint Croix  | 278        | \$18,021,883                         | \$21,008,945                |
|                | Saint John   | 3          | \$527,814                            | \$314,496                   |
|                | Saint Thomas | 59         | \$3,319,769                          | \$3,539,519                 |

Expected annual benefits by sublocation, for population, averted direct damages to infrastructure and indirect economic disruption.

**Table S3.**

| Location                 | Sublocation         | Benthic habitat data |                          | Shoreline data source |
|--------------------------|---------------------|----------------------|--------------------------|-----------------------|
|                          |                     | Minimum mapping unit | Data source              |                       |
| American Samoa           | Tutuila             | 1 acre               | Anderson, 2004a          | NOAA, 2002d           |
|                          | Ofu and Olosega     | 1 acre               | Anderson, 2004a          | NOAA, 2002a           |
|                          | Tau                 | 1 acre               | Anderson, 2004a          | NOAA, 2002a           |
| Northern Mariana Islands | Saipan              | 1 acre               | Anderson, 2004c          | NOAA, 2002b           |
|                          | Tinian              | 1 acre               | Anderson, 2004c          | NOAA, 2002c           |
| Guam                     | Guam                | 1 acre               | Anderson, 2004b          | NOAA, 2003            |
| Florida                  | Dry Tortugas        | <1 acre              | FFWCC-FWRI, 2016         | NOAA, 2015            |
|                          | Key West            | <1 acre              | FFWCC-FWRI, 2016         | NOAA, 2015            |
|                          | Florida Keys        | <1 acre              | FFWCC-FWRI, 2016         | NOAA, 2015            |
|                          | Miami               | <1 acre              | FFWCC-FWRI, 2016         | NOAA, 2015            |
|                          | Palm Beach          | <1 acre              | FFWCC-FWRI, 2016         | NOAA, 2015            |
| Hawaii                   | Island of Hawaii    | 1 acre               | Anderson, 2007           | State of Hawaii, 1997 |
|                          | Maui                | 1 acre               | Anderson, 2007           | State of Hawaii, 1997 |
|                          | Lanai               | 1 acre               | Anderson, 2007           | State of Hawaii, 1997 |
|                          | Molokai             | 1 acre               | Anderson, 2007           | State of Hawaii, 1997 |
|                          | Kahoolawe           | 1 acre               | Anderson, 2007           | State of Hawaii, 1997 |
|                          | Kauai               | 1 acre               | Anderson, 2007           | State of Hawaii, 1997 |
|                          | Niihau              | 1 acre               | Anderson, 2007           | State of Hawaii, 1997 |
| Oahu                     | 1 acre              | Anderson, 2007       | State of Hawaii, 1997    |                       |
| Puerto Rico              | Isla de Puerto Rico | 1 acre               | NOAA, 2001a              | NOAA, 2015            |
|                          | Isla de Culebra     | 1 acre               | NOAA, 2001a              | NOAA, 2015            |
|                          | Isla de Vieques     | 1 acre               | NOAA, 2001a              | NOAA, 2015            |
| US Virgin Islands        | Saint Croix         | 1 acre               | NOAA, 2001b              | NOAA, 2015            |
|                          | Saint John          | 1,000 m <sup>2</sup> | Zitello and others, 2009 | NOAA, 2015            |
|                          | Saint Thomas        | 1 acre               | NOAA, 2001c              | NOAA, 2015            |

Benthic habitat and shoreline datasets' sources and resolution.



**Table S4.**

| Coral coverage (%) | Wave friction coefficient<br>( $f_w$ ) | Current and infragravity<br>wave friction coefficient ( $c_f$ ) |
|--------------------|----------------------------------------|-----------------------------------------------------------------|
| None (sand)        | 0.10                                   | 0.01                                                            |
| 0–10               | 0.15                                   | 0.07                                                            |
| 10–50              | 0.30                                   | 0.10                                                            |
| 50–90              | 0.45                                   | 0.13                                                            |
| 90–100             | 0.60                                   | 0.15                                                            |

Wave and current friction coefficients for different percentages of coral cover as determined from benthic habitat maps.

## Supplementary Discussion 1

The sensitivity of the results to flood model alongshore transect spacing was evaluated for two end-member geomorphologies: Miami (flat mainland and barrier island; characteristic of 14% of the study area) and Oahu (steep, high island; characteristic of 86% of the study area).

Supplementary Figure 4 demonstrates the differences in flood extent for different transect spacing from 100 m (used in the study) to 200 m, 500 m, 1000 m, and 2000 m for these two end-members.

The results indicate that for low-lying coastal zones, like Miami (Supplementary Figure 4-A), larger transect spacing leads to underestimation of the flood risk, as spacing does not capture low areas in the coastal topography that are the initiation points of inland flooding. However, for more complex and steeper coastal zones, like on Oahu (Supplementary Figure 4-B), larger transect spacing (as used in previous global models) leads to overestimation of flooding because the flood extent is interpolated across large areas between transects that would not be flooded due to topographic highs. In term of people flooded, direct damages to buildings, and indirect economic disruption are also influenced by the transect spacing (Supplementary Figures 4-C, D, E). The distribution of socio-economic exposure is sensitive to definition of the flood zones, and for larger transect spacing greater than 500 m, becomes imprecise because low-lying sections of coastline are not captured in the modeled flood extents.

This comparison indicates that a lower resolution in the flood mapping leads to reduced accuracy in both geographies (overestimating/underestimating depending on the type of coastal geomorphology) across the flood risk metrics. Therefore, the most accurate results are generated using the highest possible spatial resolution data, as this accounts for more of the complexity of the coastal zone in terms of topographic features and the distribution of socioeconomic exposure. The hydrodynamic modeling and spatial analysis presented in this manuscript are at a higher resolution than any other previous national-scale coastal flood mapping and any other published valuation of the risk reduction service of any coastal ecosystem.

**Fig. S4.**

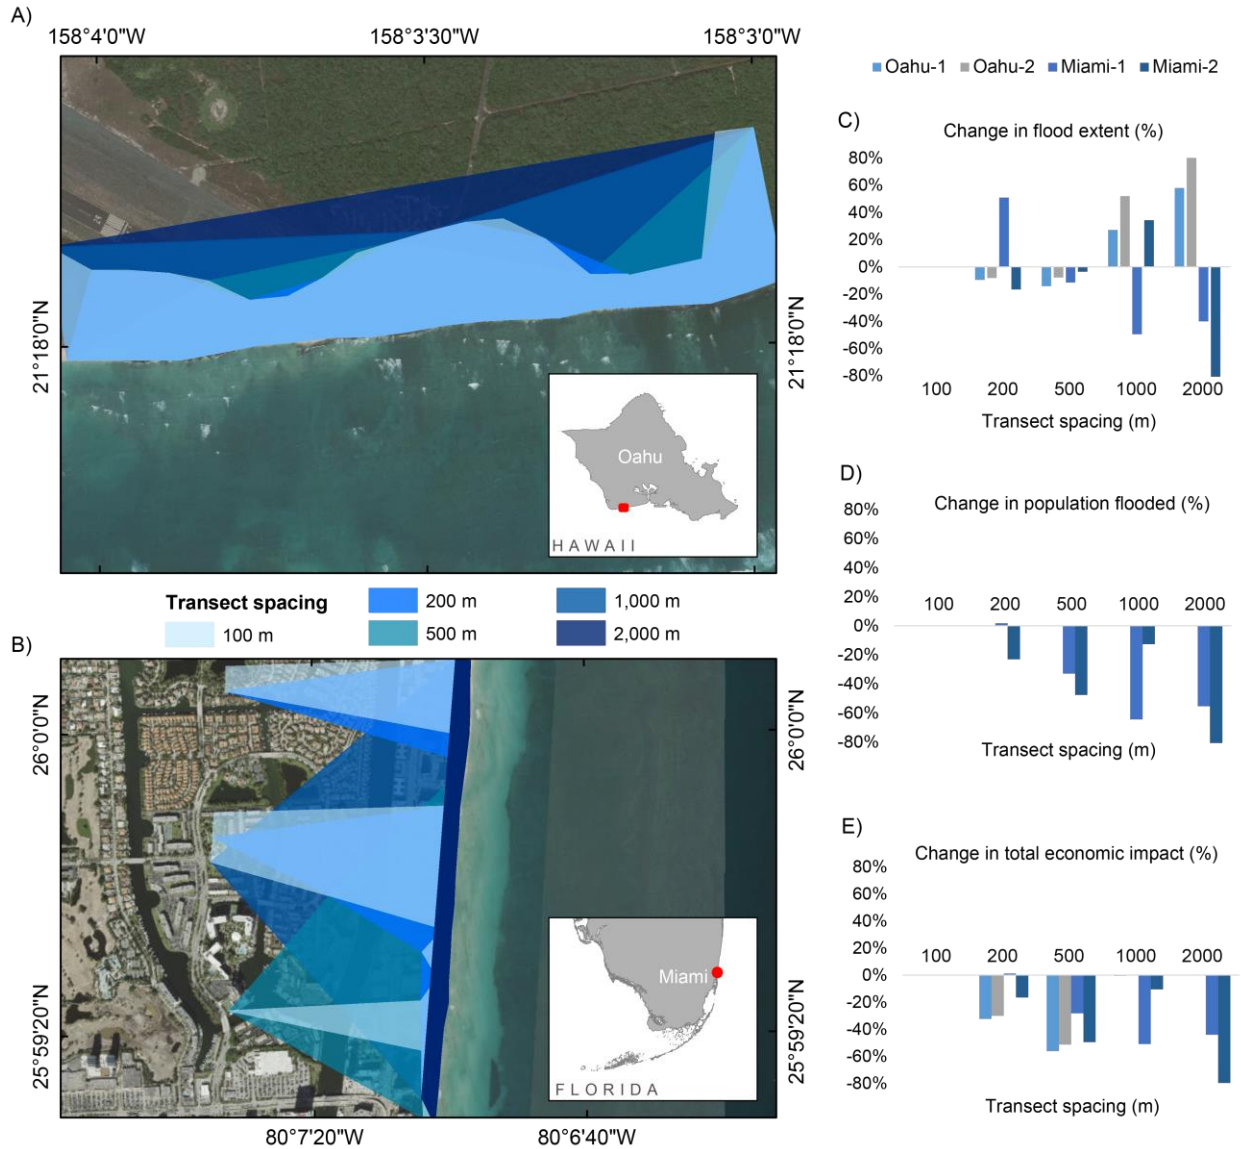

**Comparison of flood effects of different transect spacing in two distinct coastal morphologies.** The coast of Oahu (A) is characterized by steep, complex coastal topography. The coast of Miami (B) is characterized by low-lying coastal zones and barrier islands. Large transect spacing overestimates flood extent steep, complex coastal topography by integrating across coastal high points that would not be flooded (C) and underestimates flooding low-lying coastal zones and barrier islands by not capturing low areas in the coastal dunes from which inland flooding occurs. The resulting population affected (D) and total economic impact (E) is a misrepresentation of the risk (and the risk reduction benefits of the reefs), with differences up to 80% with respect to the higher resolution 100 m transect spacing. The satellite images were sourced from “World\_Imagery” from ESRI with transparency added in ArcGIS.
